# Supplementary material for: DNA damage induced by topoisomerase inhibitors activates SAMHD1 and blocks HIV‐1 infection of macrophages
Source: PubMed Central journal article supplement (PMC5753034; doi:10.15252/embj.201796880), 2017-10-30
Supplement: EMBJ-37-50-s001.pdf [file EMBJ-37-50-s001.pdf]

## Expanded View Figures

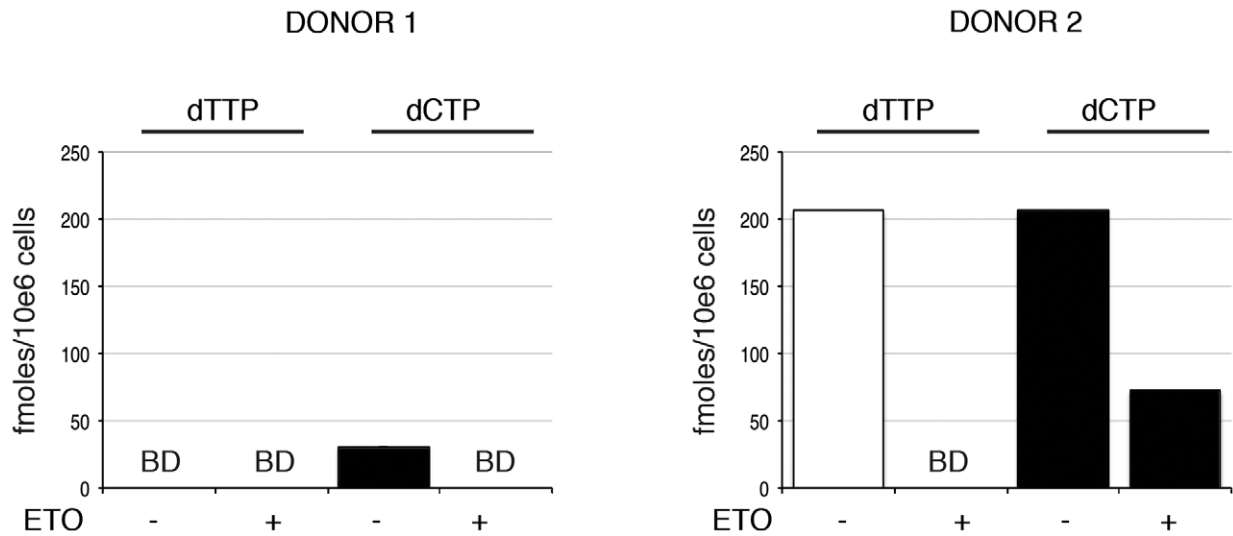

**Figure EV1. Quantification of dNTP levels in MDM treated with etoposide (ETO).**

Analysis of cellular dNTP levels in unstimulated and ETO-treated MDM. dNTPs were extracted for quantification from two donors. The bar graph shows the amounts (fmoles per  $10^6$  cells) of the indicated dNTP from each donor, with and without ETO treatment. BD: below level of detection.

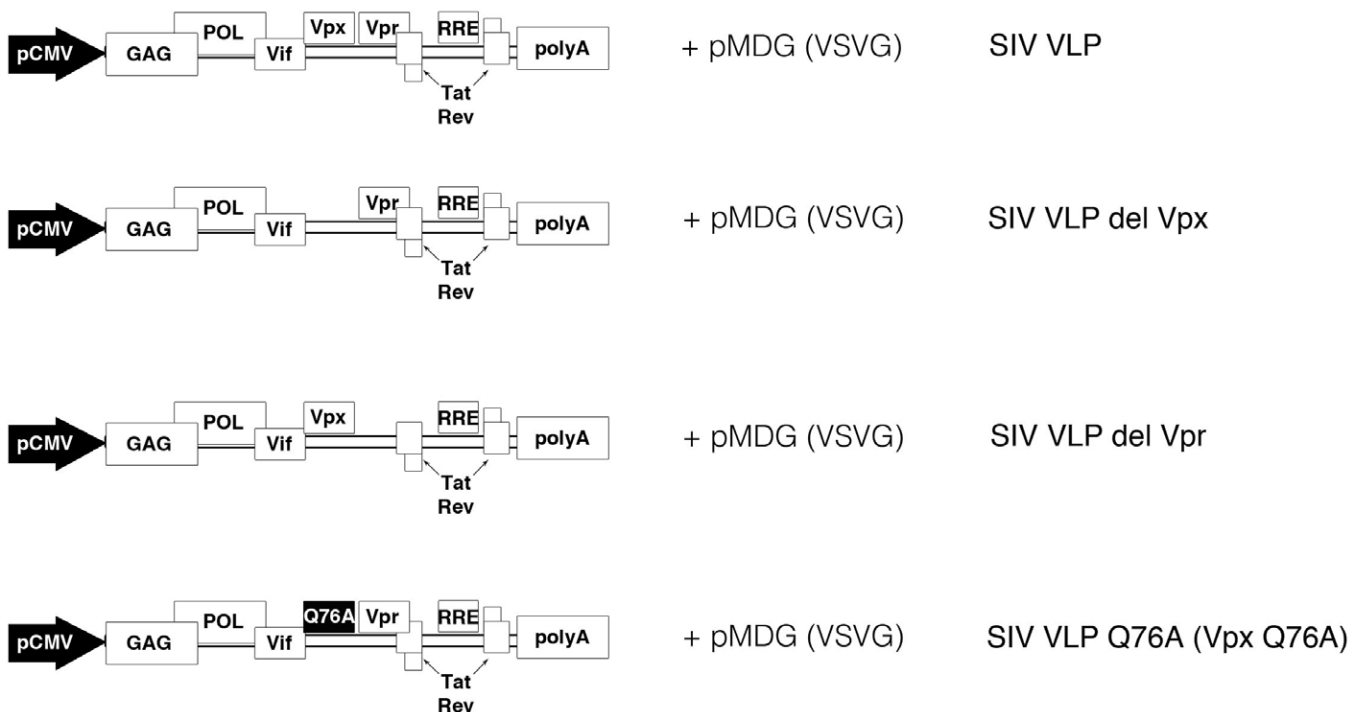

**Figure EV2. Schematic representation of SIVmac VLP used in the study.**

Schematic representation of the packaging plasmids derived from SIVmac251. SIVmac virus-like (SIV VLP) particles were prepared as described in Materials and Methods.

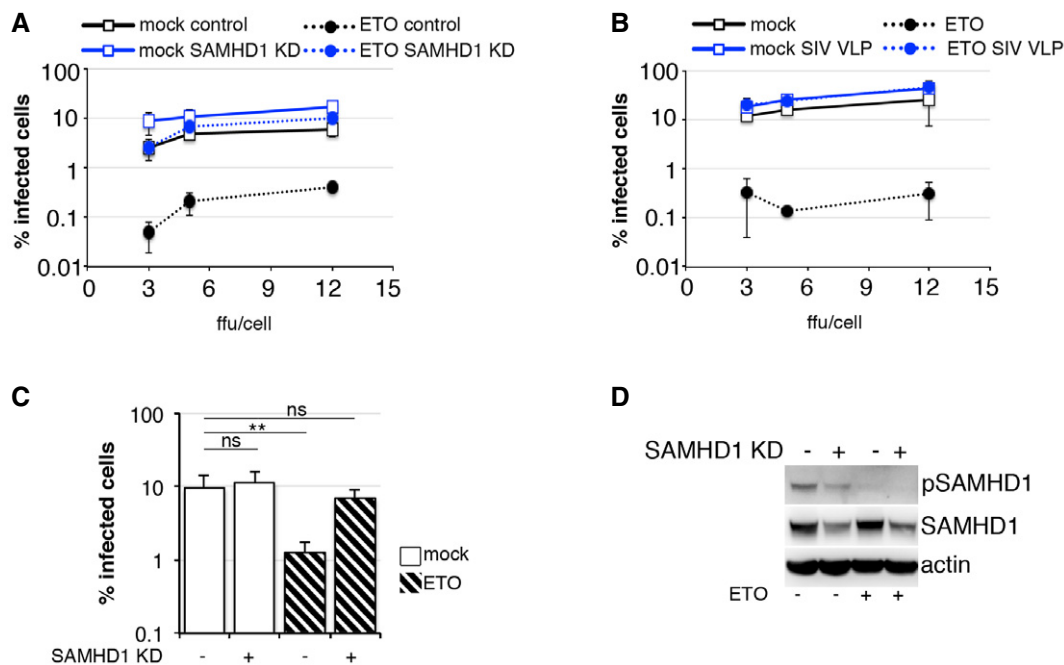

**Figure EV3. SAMHD1 inhibits HIV-1 following DNA damage.**

A MDM were transfected with control or pool of SAMHD1 (KD) siRNA and 3 days later treated with 5  $\mu$ M ETO and infected in the presence of ETO with HIV-1 BaL (3, 5, 12 ffu/cell). Cells were stained for intracellular p24, and the percentage of infected cells was quantified 48 h post-infection by FACS ( $n = 3$ , mean  $\pm$  s.e.m.).  
 B MDM were treated with 5  $\mu$ M ETO for 18 h and co-infected in the presence of ETO with HIV-1 BaL (3, 5, 12 ffu/cell) and SIVmac virus-like particles containing Vpx/Vpr (SIV VLP). Cells were stained for intracellular p24, and the percentage of infected cells was quantified 48 h post-infection by FACS ( $n = 3$ , mean  $\pm$  s.e.m.).  
 C MDM were transfected with control or pool of SAMHD1 (KD) siRNA and 3 days later treated with 5  $\mu$ M ETO for 18 h and infected in the presence of ETO with VSV-G HIV-1 GFP. The percentage of infected cells was quantified by the automated cell-imaging system Hermes WiScan and ImageJ 48 h post-infection ( $n = 3$ , mean  $\pm$  s.e.m.; \*\* $P$ -value  $\leq 0.01$ ; (ns) non-significant, paired  $t$ -test).  
 D Cells from a representative donor were used for immunoblotting.

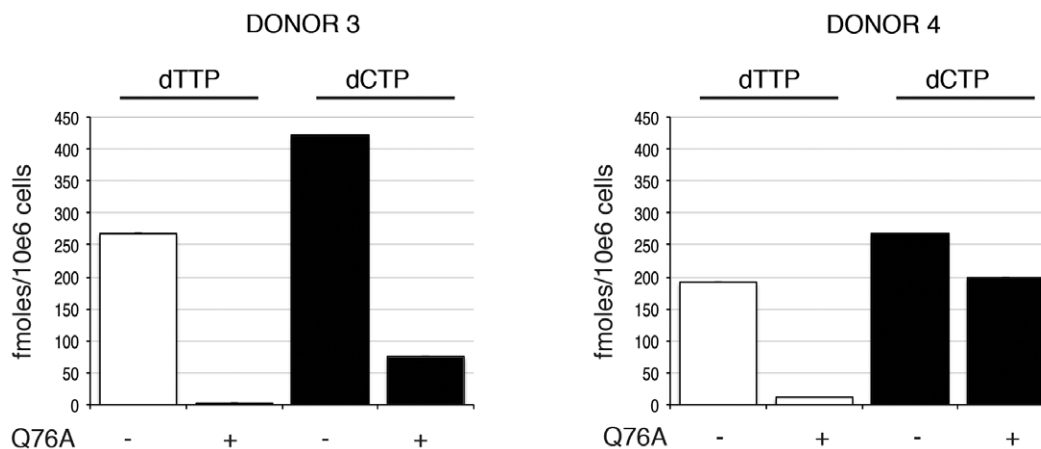

**Figure EV4. Quantification of dNTP levels in MDM following treatment with SIV VLP Q76A.**

Analysis of cellular dNTP levels in MDM and MDM expressing SIV Vpx(Q76A). dNTPs were extracted for quantification from two donors. The bar graph shows the amounts (fmoles per  $10^6$  cells) of the indicated dNTP from the MDM of each donor, before and after the introduction of SIV Vpx(Q76A) in SIV VLPs.
