# Supplementary material for: DNA damage induced by topoisomerase inhibitors activates SAMHD1 and blocks HIV‐1 infection of macrophages
Source: PubMed Central journal article supplement (PMC5753034; doi:10.15252/embj.201796880), 2017-10-30

Figure 3C

Actin

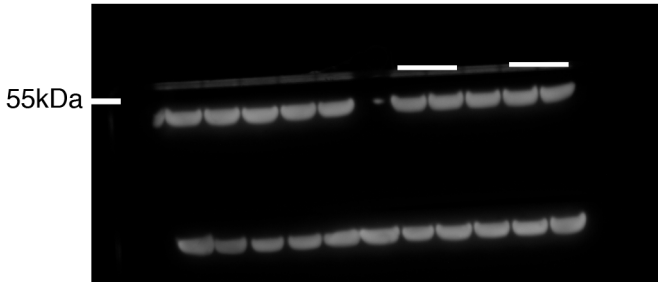

SAMHD1

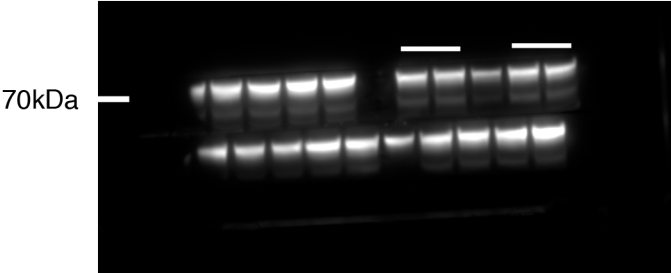

pSAMHD1

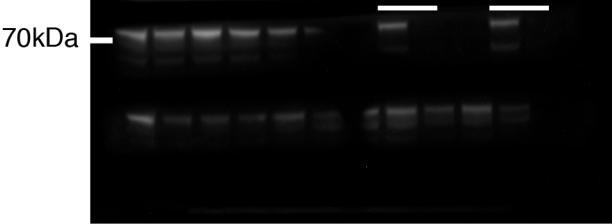

Supplement: EMBJ-37-50-s004.pdf [file EMBJ-37-50-s004.pdf]
